# Supplementary material
Source: PubMed Central journal article supplement (PMC6606371)

**Supplemental Figure 1: Synteny of the VenY genomic region. The genome scaffolds showing the position and direction of VenY<sub>A</sub> (yellow bars) and VenY<sub>B</sub> (orange bars). The star (\*) signifies a nonfunctional gene. Colors represent synteny blocks across genomes.**

***M. raptor***

**Scaffold 602**

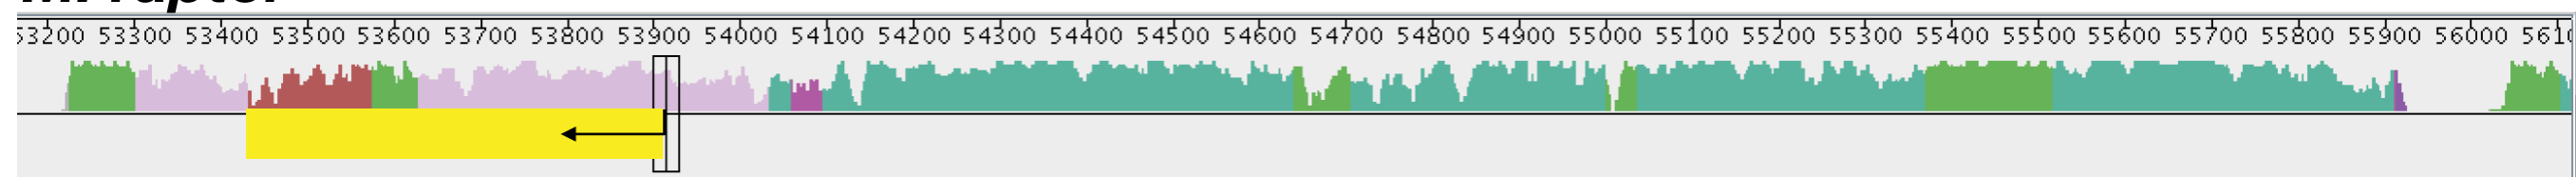

***M. raptorellus***

**Scaffold 3279**

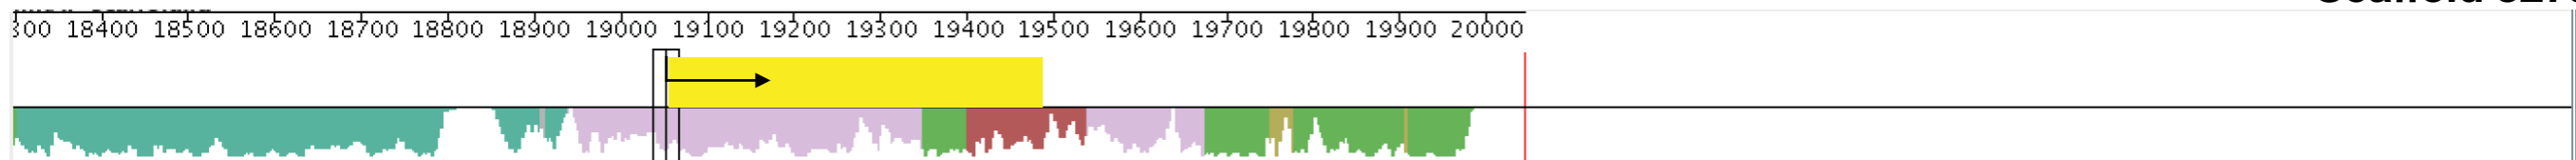

***M. uniraptor***

**Scaffold 3154**

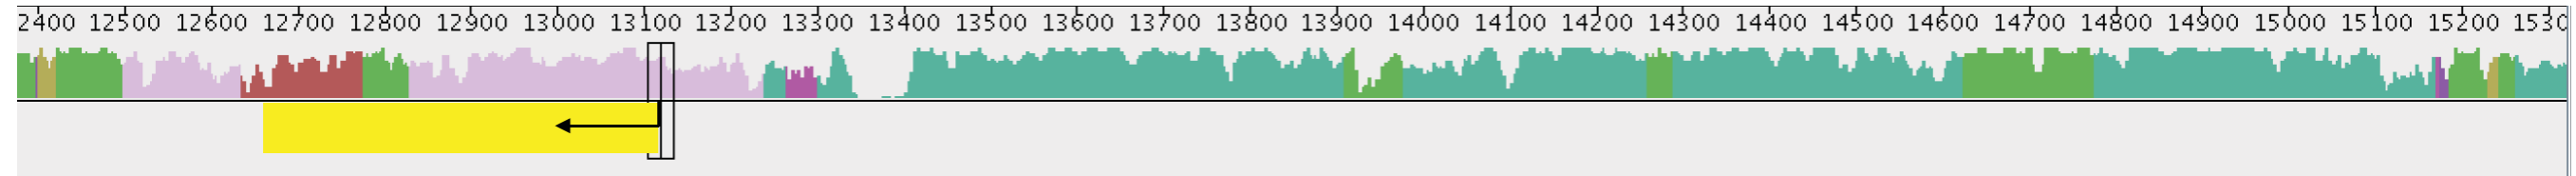

***N. giraulti***

**Scaffold 959**

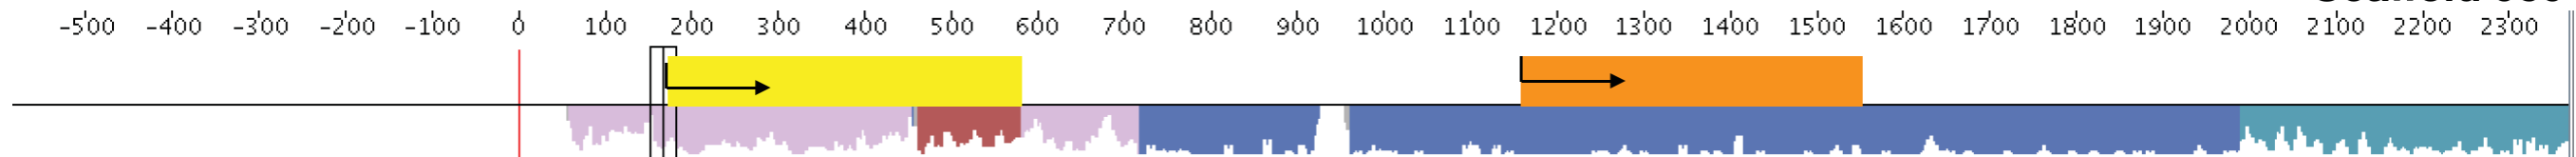

***T. sarcophagae***

**Scaffold 1655**

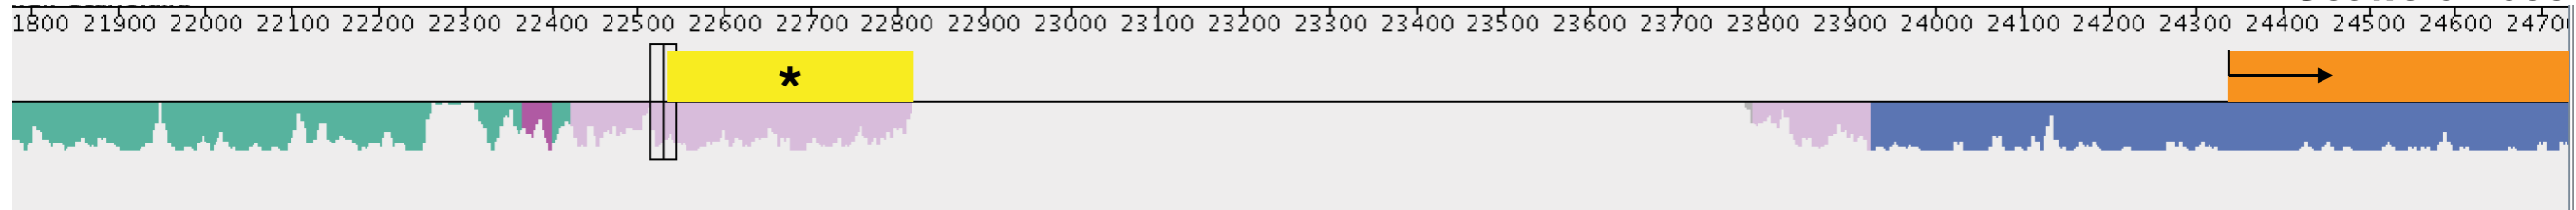

**Supplemental Figure 2: Deletion of VenY region in *N. vitripennis*. A zoomed out view of the genome scaffolds showing the position and direction of VenY region from Sup Fig 1 in black boxes. Colors represent synteny blocks across genomes. Flanking regions of *N. vitripennis* match the other scaffolds, but large indel removed ~2500bp including the VenomY region**

***M. raptor***

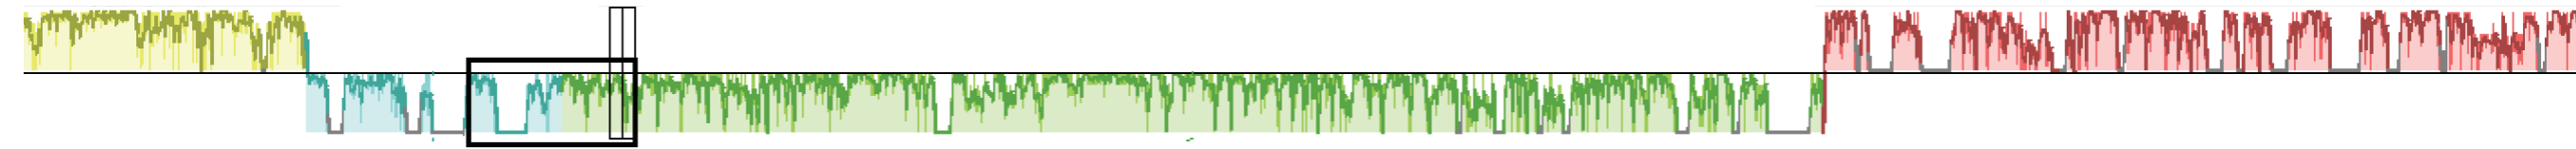

***M. raptorellus***

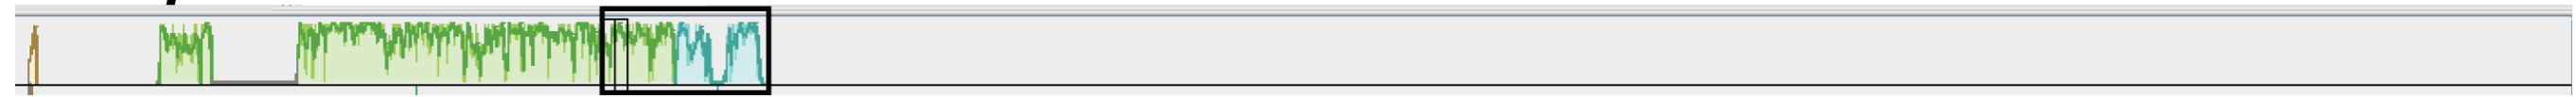

***M. uniraptor***

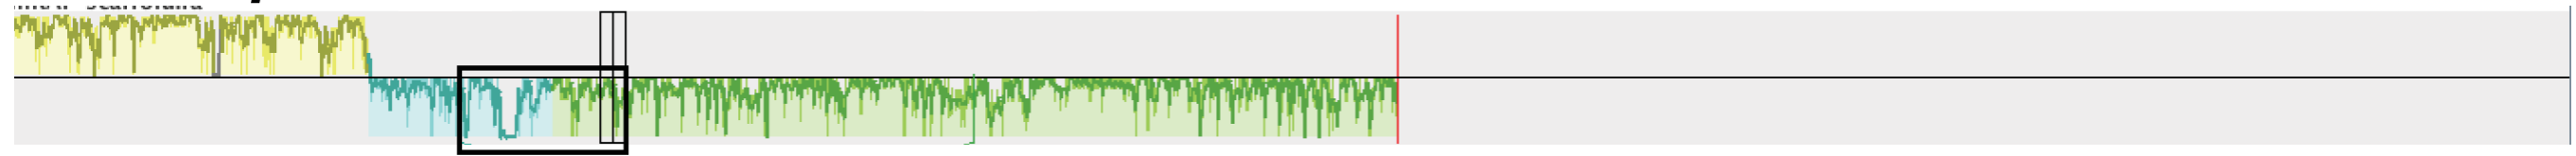

***N. giraulti***

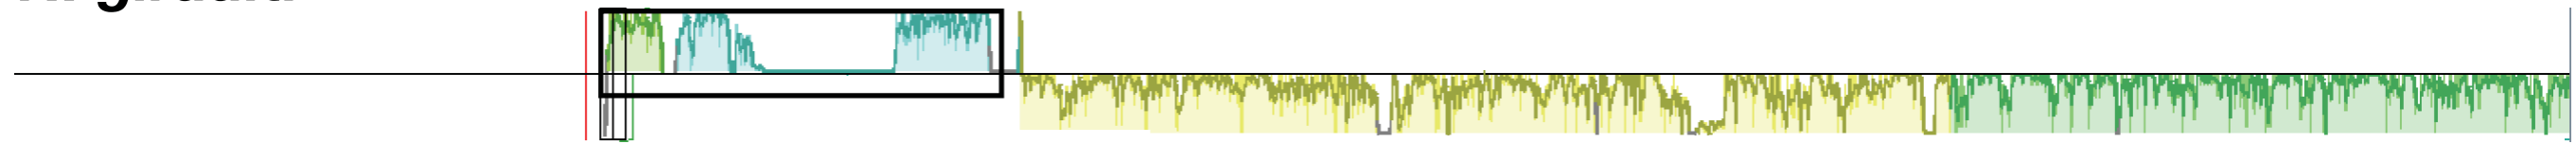

***T. sarcophagae***

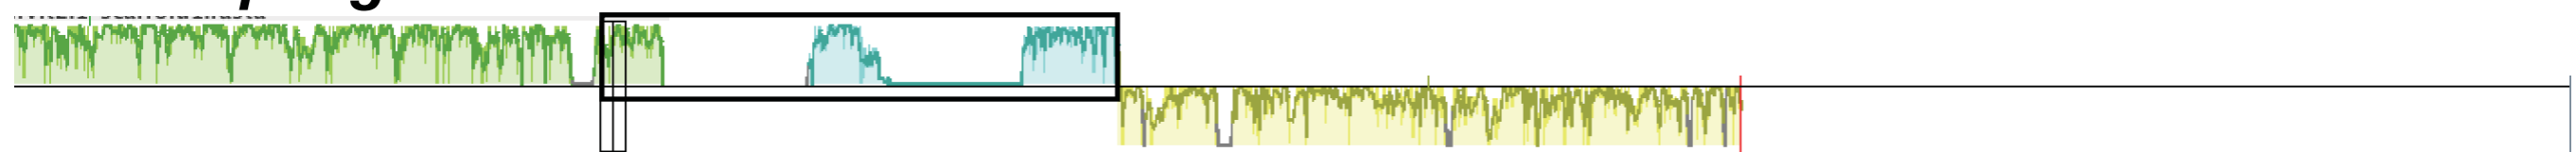

***N. vitripennis***

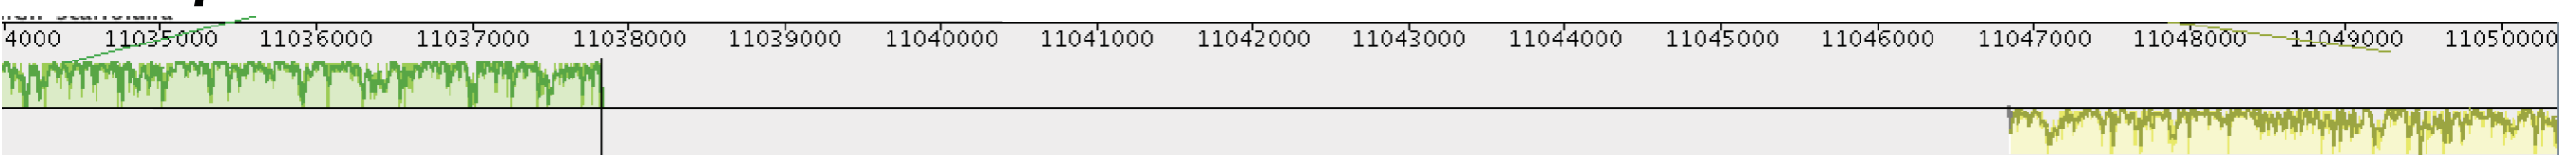

**Supplemental Figure 3: An SDS PAGE gel showing that VenY is not affected by the LacZ RNAi control. The gel contains size separation of venom reservoir proteins for *N. giraulti*, INT\_VenY#40 (an introgression line between *N. giraulti* and *N. vitripennis* that does not contain VenY), whole *N. vitripennis* venom, *N. vitripennis* following VenY knocked down via RNAi, and *N. vitripennis* LacZ RNAi control venom. VenY is the smallest protein visible on the gel, with a molecular weight around 5kDa.**

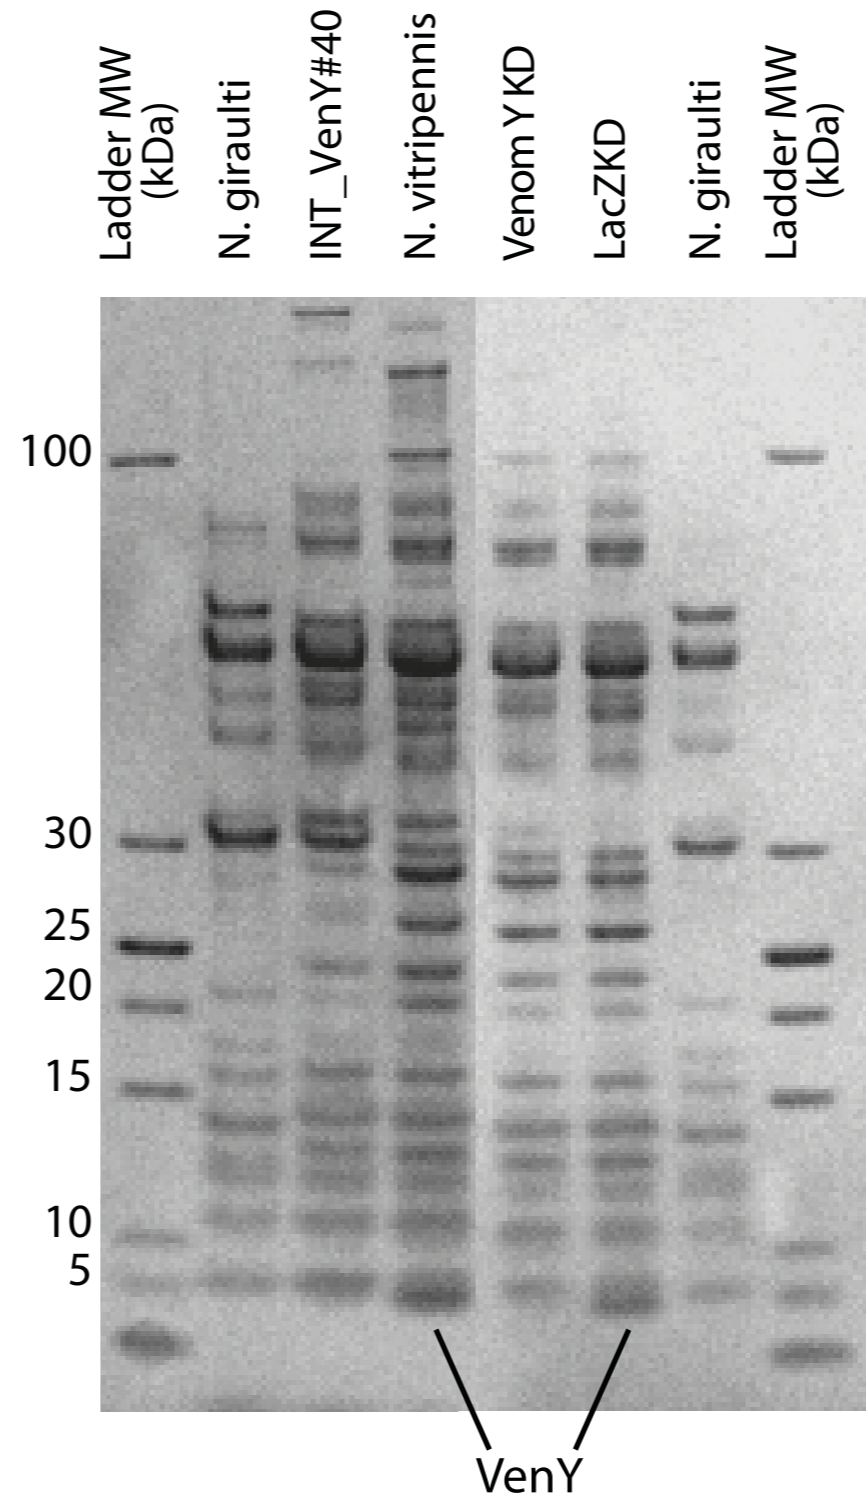

Supplement: NIHMS1005992-supplement-Supp_figS1-4.pdf [file NIHMS1005992-supplement-Supp_figS1-4.pdf]
